# Supplementary material
Source: PubMed Central journal article supplement (PMC8763392)
Supplement: NIHMS1754167-supplement-Supporting_Information.pdf [file NIHMS1754167-supplement-Supporting_Information.pdf]

**$\alpha$ 1-FANGs—Protein Ligands Selective for the  $\alpha$ -Bungarotoxin site of the  $\alpha$ 1-Nicotinic Acetylcholine Receptor**

**Authors:** Aaron L. Nichols<sup>1</sup>, Kaori Noridomi<sup>2</sup>, Christopher R. Hughes<sup>3</sup>, Farzad Jalali-Yazdi<sup>3</sup>, J. Brek Eaton<sup>4</sup>, Lan Huong Lai<sup>1</sup>, Gaurav Advani<sup>3</sup>, Ronald J. Lukas<sup>4</sup>, Henry A. Lester<sup>5</sup>, Lin Chen<sup>1,2,6</sup>, Richard W. Roberts<sup>1,2,3,6,7\*</sup>

<sup>1</sup> **Department of Chemistry, University of Southern California**

<sup>2</sup> **Department of Molecular and Computational Biology, University of Southern California**

<sup>3</sup> **Mork Family Department of Chemical Engineering and Material Sciences, University of Southern California**

<sup>4</sup> **Barrow Neurological Institute, St. Joseph's Hospital and Medical Center, University of Arizona**

<sup>5</sup> **Division of Biology and Biological Engineering, California Institute of Technology, Pasadena, California, USA**

<sup>6</sup> **Norris Cancer Center, University of Southern California, Los Angeles, California, USA**

<sup>7</sup> **Department of Biomedical Engineering, University of Southern California, Los Angeles, California, USA**

\* E-mail:richrob@usc.edu

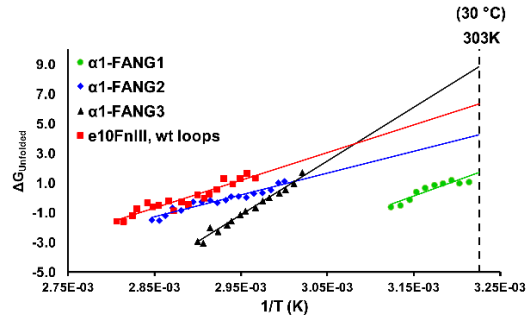

**Supplemental Figure 1. Plot of  $\Delta G_{\text{unfolding}}$  versus inverse temperature of  $\alpha 1$ -FANG1 and derivatives.** Direct comparison of  $\Delta G_{\text{unfolding}}$  with  $1/T$  for  $\alpha 1$ -FANG ligands using the experimentally derived circular dichroism melting data shows the different  $\Delta H$  contributions (slope) of each protein to overall stability. When extrapolated to  $3.25E-03$  ( $30^{\circ}\text{C}$ ) to compare with historical data, the high stability of  $\alpha 1$ -FANG3 versus parent clones is clear.

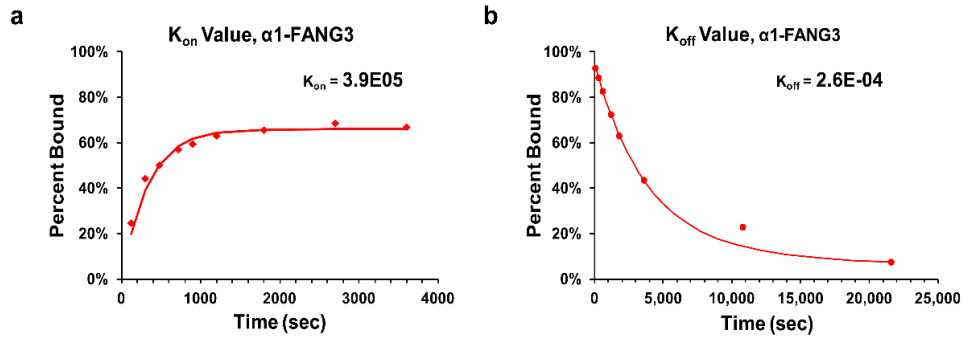

**Supplemental Figure 2. Determination of α1-FANG3 K<sub>on</sub> and K<sub>off</sub> rates via radiolabeled binding assays.** A) K<sub>on</sub> of α1-FANG3 was determined by the pulldown of excess <sup>35</sup>S labeled α1-FANG3 against α211 immobilized on beads. K<sub>on</sub> was fit using excel and determined to be 3.9E5. B) K<sub>off</sub> of α1-FANG3 was determined by a direct competition of α-Btx with <sup>35</sup>S labeled α1-FANG3 bound to α211 immobilized on beads.
